# Supplementary material
Source: PubMed Central journal article supplement (PMC8082734)
Supplement: Supp_FigS1.pdf [file Supp_FigS1.pdf]

Figure S1: Human Approach Test (HAT) Missing Value Analysis

# Missing Values Analysis: 4 Human Approach Test Studies

## Data Elements

Complete Missing

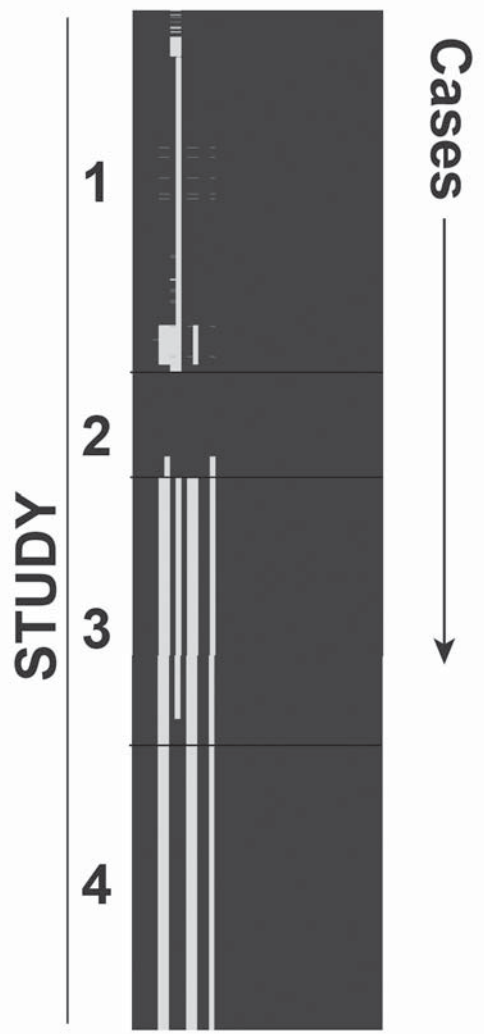

## Summary of Missingness

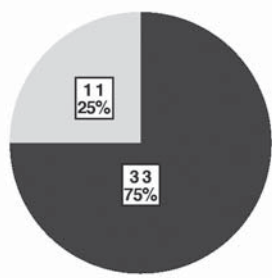

Variables

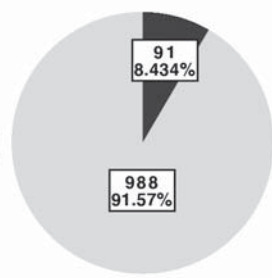

Cases

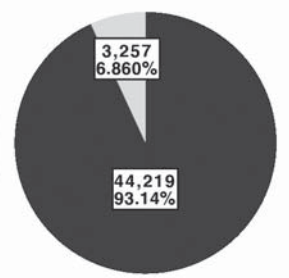

Values

## Patterns of Missingness

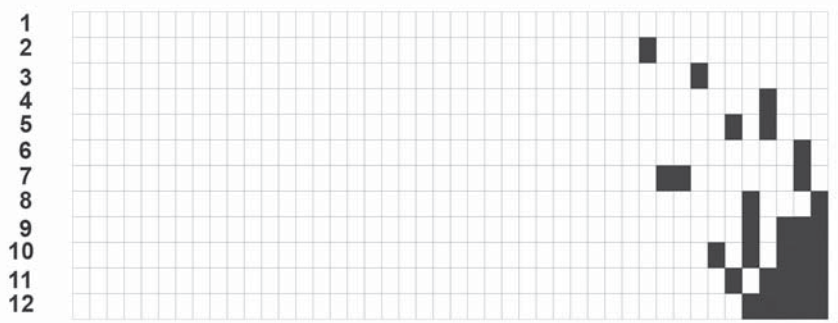

Data Elements
